# Supplementary material for: Clinical outcomes of patients diagnosed with cancer of unknown primary or malignancy of undefined primary origin who were referred to a regional cancer center
Source: Springer Nature journal article supplement (doi:10.1007/s10147-023-02316-y), 2023-03-10

**Appendix table 1 Patients' characteristics between predictable and non-predictable primary-site**

|                            | Predictable<br>primary-site<br>(n=114) | Non-predictable<br>primary-site (n=41) |                                          |
|----------------------------|----------------------------------------|----------------------------------------|------------------------------------------|
| Male / Female              | 60 / 54                                | 29 / 12                                |                                          |
| Age median (range)         | 66 (28 - 83)                           | 64 (30 - 79)                           |                                          |
| ECOG PS                    | 1 (0 - 3)                              | 1 (0 - 4)                              |                                          |
| Number of metastatic sites | 1 (1 - 5)                              | 1 (1 - 4)                              |                                          |
|                            | n(%)                                   | n(%)                                   |                                          |
| Metastatic site            |                                        |                                        | P value (Predictable vs Non-predictable) |
| Lymph node                 | 62 (54)                                | 25 (61)                                | 0.582                                    |
| Bone                       | 31 (27)                                | 19 (46)                                | 0.0321                                   |
| Liver                      | 22 (19)                                | 5 (12)                                 | 0.348                                    |
| Lung                       | 17 (15)                                | 2 (5)                                  | 0.105                                    |
| Peritoneum                 | 35 (31)                                | 4 (10)                                 | 0.0108                                   |
| Histopathology             |                                        |                                        |                                          |
| Squamous cell carcinoma    | 11 (10)                                | 12 (29)                                | 0.004                                    |

**Appendix table 2 Therapy for 206 patients with cancer of unknown primary at the Aichi Cancer Center Hospital**

|                                           | Favorable-risk<br>subtypes<br>(n=57) | Unfavorable-risk<br>subtype<br>(n=149) |
|-------------------------------------------|--------------------------------------|----------------------------------------|
| Systemic therapy only                     | 23                                   | 77                                     |
| Surgery only                              | 2                                    | 1                                      |
| Radiotherapy only                         | 1                                    | 6                                      |
| Systemic therapy + Surgery                | 8                                    | 9                                      |
| Systemic therapy + Radiotherapy           | 10                                   | 35                                     |
| Systemic therapy + Surgery + Radiotherapy | 10                                   | 12                                     |
| Surgery + Radiotherapy                    | 1                                    | 0                                      |
| Best supportive care only                 | 2                                    | 9                                      |

**Appendix table 3 Regimens of the first-line systemic therapy for 133 patients with unfavorable-risk subgroup of cancer of unknown primary**

| Predicted primary-site by the algorithm | Non-predicted primary-site | Breast / skin appendage / salivary gland cancer profile | Non-small cell lung cancer profile | Gastric / pancreatic / bile duct cancer profile | Urinary tract cancer profile | Renal cell cancer profile | Ovarian / endometrial cancer profile | Uterus cervical cancer profile | Melanoma of unknown primary |
|-----------------------------------------|----------------------------|---------------------------------------------------------|------------------------------------|-------------------------------------------------|------------------------------|---------------------------|--------------------------------------|--------------------------------|-----------------------------|
|                                         | (n=30)                     | (n=13)                                                  | (n=8)                              | (n=58)                                          | (n=6)                        | (n=4)                     | (n=5)                                | (n=7)                          | (n=2)                       |
| Regimens                                |                            |                                                         |                                    |                                                 |                              |                           |                                      |                                |                             |
| Platinum+Taxane                         | 19                         | 8                                                       | 6                                  | 1                                               | 1                            |                           | 5                                    | 3                              |                             |
| CDDP+VP-16                              | 1                          |                                                         |                                    |                                                 |                              |                           |                                      |                                |                             |
| CBDCA+GEM                               | 3                          |                                                         |                                    | 2                                               | 4                            |                           |                                      |                                |                             |
| CDDP+PEM                                |                            |                                                         | 1                                  |                                                 |                              |                           |                                      |                                |                             |
| Platinum+5-FU                           | 4                          | 1                                                       |                                    |                                                 |                              |                           |                                      | 3                              |                             |
| L-OHP+5-FU                              | 1                          | 1                                                       |                                    | 51                                              | 1                            |                           |                                      |                                |                             |
| GEM+5-FU                                | 1                          |                                                         |                                    | 1                                               |                              |                           |                                      |                                |                             |
| Anthra/Taxane                           |                            | 1                                                       |                                    |                                                 |                              |                           |                                      |                                |                             |
| Single agent†                           | 1                          |                                                         |                                    | 2                                               |                              |                           |                                      |                                |                             |
| Immuno check point inhibitor††          |                            |                                                         | 1                                  | 1                                               |                              |                           |                                      | 1                              | 2                           |
| Endocrine‡                              |                            | 2                                                       |                                    |                                                 |                              |                           |                                      |                                |                             |
| VEGFR TKI§                              |                            |                                                         |                                    |                                                 |                              | 4                         |                                      |                                |                             |
| Time to                                 |                            |                                                         |                                    |                                                 |                              |                           |                                      |                                |                             |
| treatment failure months (95% C.I.)     | 4.0 (2 - 6)                | 11.0 (0 - 19)                                           | 4.0 (0 - 6)                        | 3.5 (2 - 4)                                     | 2.0 (0 - NA)                 | 24.0 (18 - NA)            | 10.0 (0 - NA)                        | 9.0 (1 - NA)                   | 3 .0 and 4.0                |

Anthra, anthracycline, CBDCA, carboplatin, CDDP, cisplatin, 5-FU, 5-fluorouracil, GEM, gemcitabine, L-OHP, oxaliplatin, NA, not available, Platinum, cisplatin or carboplatin, VEGFR TKI, vascular endothelial growth factor receptor tyrosine kinase inhibitor †S-1 or docetaxel, ††nivolumab, pembrolizumab, or combination with ipilimumab and nivolumab, ‡axitinib, sunitinib, pazopanib, §anastrozole, letrozole

**Appendix table 4 Subgroup analysis for overall survival of unfavorable-risk subgroup treated with systemic therapy**

| n=133                      | Univariate analysis           |                    |              |             |         | Multivariate analysis |             |         |
|----------------------------|-------------------------------|--------------------|--------------|-------------|---------|-----------------------|-------------|---------|
|                            | Factors                       | Number of patients | Hazard ratio | 95% C.I.    | P value | Hazard ratio          | 95% C.I.    | P value |
| Age                        | 65> / 65=<                    | 61 / 72            | 0.99         | 0.66 - 1.48 | 0.97    |                       |             |         |
| Sex                        | Male / Female                 | 78 / 55            | 1.23         | 0.21 - 0.99 | 0.32    |                       |             |         |
| ECOG PS                    | 0, 1 / 2, 3                   | 95 / 38            | 1.94         | 1.27 - 2.95 | 0.002   | 1.9                   | 1.24 - 2.90 | 0.003   |
| Number of metastatic sites | 1, 2 / 3=<                    | 107 / 26           | 2.8          | 1.75 - 4.48 | 0.00002 | 1.92                  | 1.06 - 3.48 | 0.03    |
| Liver metastasis           | No / Yes                      | 106/27             | 2.84         | 1.77 - 4.55 | 0.00002 | 1.9                   | 1.05 - 3.46 | 0.04    |
| Bone metastasis            | No / Yes                      | 92 / 41            | 1.44         | 0.94 - 2.21 | 0.09    |                       |             |         |
| Predictable primary-site   | Predictable / Non-predictable | 103 / 30           | 1.22         | 0.75 - 1.98 | 0.42    |                       |             |         |

PS, performance status

# Appendix figure

| Final diagnosis at the Aichi Cancer Center Hospital | Events    | Median OS months | 95% C.I. |
|-----------------------------------------------------|-----------|------------------|----------|
| MUO                                                 | 10 / 12   | 0.75             | 0 – 3    |
| Provisional CUP                                     | 9 / 13    | 1                | 1 – 12   |
| Confirmed CUP                                       | 134 / 206 | 16               | 13 – 20  |
| Primary-site identified                             | 16 / 38   | 24               | 6 - NE   |

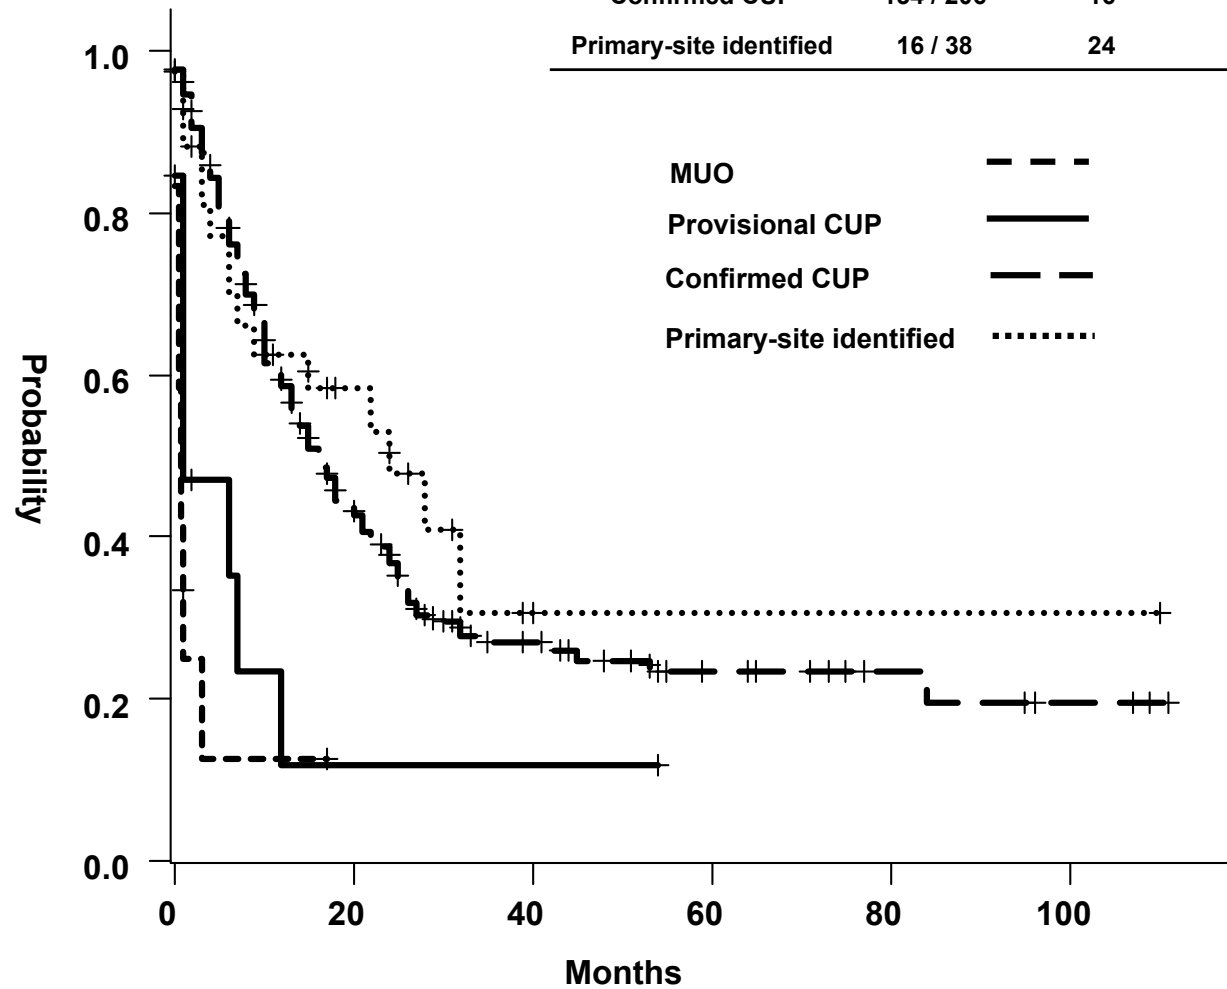

Supplement: MOESM1 [file 24608786]
